# Supplementary material for: Development of a Qualitative Test to Detect the Presence of Organophosphate Pesticides on Fruits and Vegetables
Source: MDPI journal article supplement (doi:10.3390/life13020490), 2023-02-10
Supplement: s1 [file s1]

| A                                                                                 | B                                                                                 | C                                                                                 | D                                                                                 | E                                                                                  | F                                                                                   | G                                                                                   |
|-----------------------------------------------------------------------------------|-----------------------------------------------------------------------------------|-----------------------------------------------------------------------------------|-----------------------------------------------------------------------------------|------------------------------------------------------------------------------------|-------------------------------------------------------------------------------------|-------------------------------------------------------------------------------------|
| Positive Control                                                                  | Negative Control                                                                  | Extraction from aubergines + SDS 0.025%                                           | Extraction from aubergines + SsoPox 2 µg                                          | Extraction from aubergines + SDS 0.025% + SsoPox 1 µg                              | Extraction from aubergines + SDS 0.025% + SsoPox 2 µg                               | Extraction from aubergines + SDS 0.025% + SsoPox 2 µg + EST2 1 µg                   |
|  |  |  |  |  |  |  |
| 100 ± 5 %                                                                         | 0 %                                                                               | 18.0 ± 2.2%                                                                       | 11.5 ± 0.4 %                                                                      | 17 ± 0.1 %                                                                         | 16 ± 2 %                                                                            | 28.6 ± 2.5 %                                                                        |

**Figure S1.** Tests on aubergines. The densitometric analysis of nitrocellulose sheet obtained from aubergines of unknown origin was made by using the GelQuantNET program (<http://biochemlabsolutions.com/GelQuantNET.html>). The purple color is the residual activity of EST2 enzyme. Results are the mean of three different experiments.

|            | A                                                                                   | B                                                                                   | C                                                                                    | D                                                                                     |
|------------|-------------------------------------------------------------------------------------|-------------------------------------------------------------------------------------|--------------------------------------------------------------------------------------|---------------------------------------------------------------------------------------|
|            | Positive Control                                                                    | Negative Control                                                                    | Extraction after decontamination                                                     | Extraction after decontamination + EST2 1µg                                           |
| Apples     |  |  |  |  |
| Aubergines |  |  |  |  |

**Figure S2.** Tests of decontamination on apples and aubergines. Fruits and vegetables were washed in tap water containing 0.025% SDS and SsoPox 1 mg/L for 60 min. The densitometric analysis of nitrocellulose sheet obtained from apples and aubergines was made by using the GelQuantNET program (<http://biochemlabsolutions.com/GelQuantNET.html>). The purple color is the residual activity of EST2 enzyme. Results are the mean of three different experiments.
